# Supplementary material for: Six weeks of N-acetylcysteine antioxidant in drinking water decreases pathological fiber branching in MDX mouse dystrophic fast-twitch skeletal muscle
Source: PubMed Central journal article supplement (PMC9971923; doi:10.3389/fphys.2023.1109587), 2023-02-14

## Supplementary A

### Complex (3+) branching in *mdx* EDL muscles

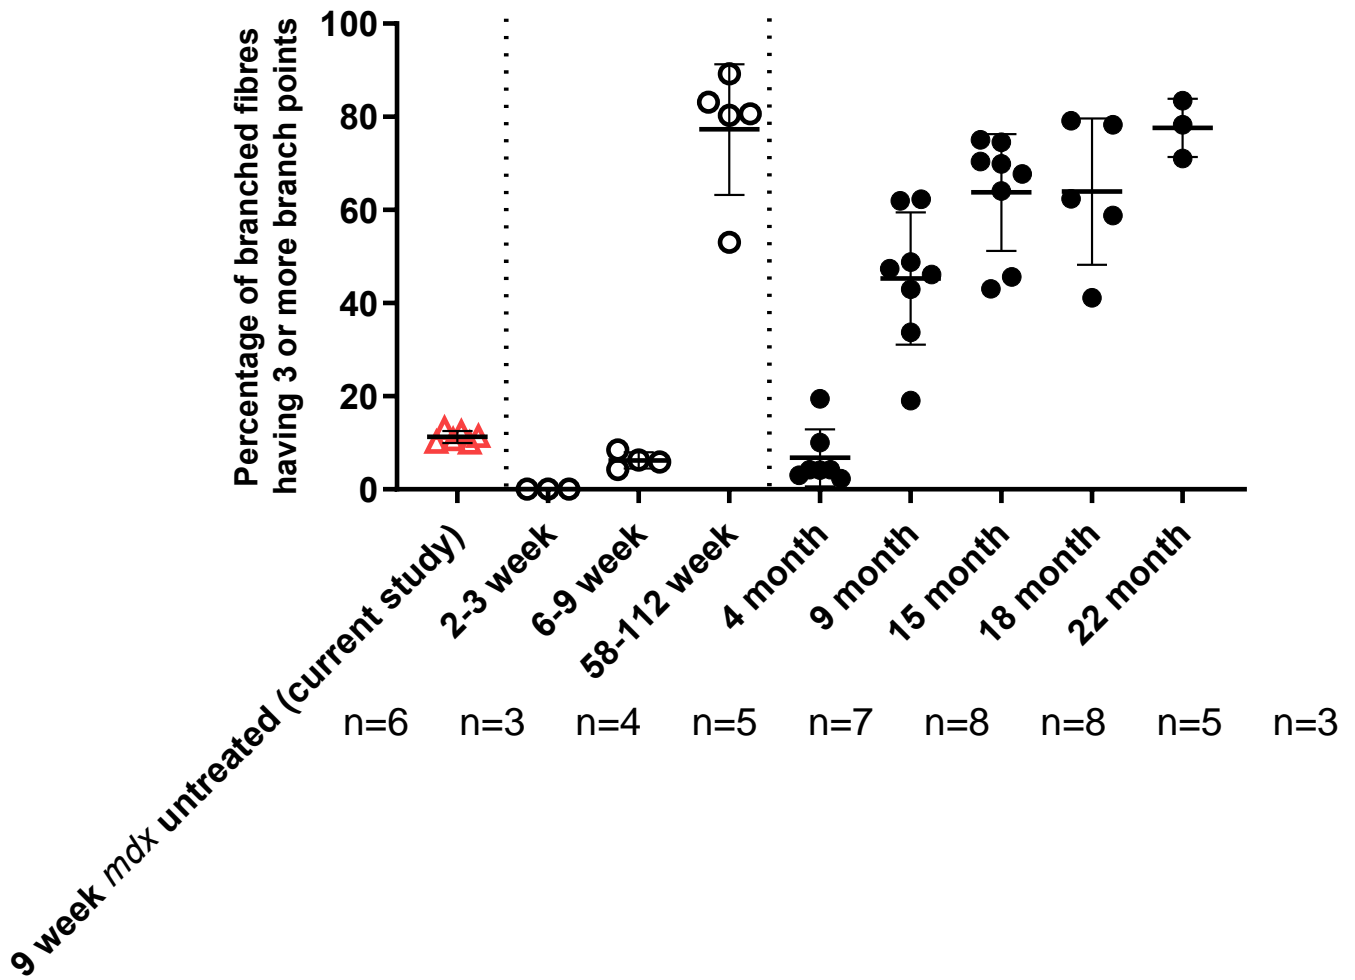

Supplement: Image1.pdf [file Image1.pdf]
