# Supplementary material for: Six weeks of N-acetylcysteine antioxidant in drinking water decreases pathological fiber branching in MDX mouse dystrophic fast-twitch skeletal muscle
Source: PubMed Central journal article supplement (PMC9971923; doi:10.3389/fphys.2023.1109587), 2023-02-14
Supplement: Table1.pdf [file Table1.pdf]

## **SUPPLEMENTARY TABLE S1**

### **Kiriaev et al. 2018**

| Šídák's multiple comparisons test | One-way ANOVA interaction | P-value (multiple comparisons) |
|-----------------------------------|---------------------------|--------------------------------|
| 2-3 week vs. 6-9 week             | ****                      | ns                             |
| 2-3 week vs. 58-112 week          |                           | ****                           |
| 6-9 week vs. 58-112 week          |                           | ****                           |

### **Kiriaev et al. 2021**

| Šídák's multiple comparisons test | One-way ANOVA interaction | P-value (multiple comparisons) |
|-----------------------------------|---------------------------|--------------------------------|
| 4 month vs. 9 month               | ****                      | ****                           |
| 4 month vs. 15 month              |                           | ****                           |
| 4 month vs. 18 month              |                           | ****                           |
| 4 month vs. 22 month              |                           | ****                           |
| 9 month vs. 15 month              |                           | *                              |
| 9 month vs. 18 month              |                           | NS                             |
| 9 month vs. 22 month              |                           | **                             |
| 15 month vs. 18 month             |                           | NS                             |
| 15 month vs. 22 month             |                           | NS                             |
| 18 month vs. 22 month             |                           | NS                             |
