# Supplementary material for: Six weeks of N-acetylcysteine antioxidant in drinking water decreases pathological fiber branching in MDX mouse dystrophic fast-twitch skeletal muscle
Source: PubMed Central journal article supplement (PMC9971923; doi:10.3389/fphys.2023.1109587), 2023-02-14
Supplement: Table2.pdf [file Table2.pdf]

## Supplementary table S2

|                                             |          | LC untreated   | LC treated     | <i>mdx</i> untreated | <i>mdx</i> treated |
|---------------------------------------------|----------|----------------|----------------|----------------------|--------------------|
| Maximum absolute tetanic force (mN)         |          | 329.28 ± 20.91 | 307.66 ± 31.92 | 299.79 ± 24.14       | 256.98 ± 33.83     |
| Twitch force (mN)                           | Pre EC   | 50.44 ± 7.42   | 47.16 ± 6.17   | 52.89 ± 10.69        | 42.38 ± 6.06       |
|                                             | Post EC  | 36.09 ± 4.26   | 30.94 ± 3.12   | 6.03 ± 4.86          | 6.20 ± 2.13        |
|                                             | Recovery | 32.52 ± 3.88   | 27.90 ± 3.47   | 6.57 ± 4.44          | 5.24 ± 2.64        |
| Twitch specific force (mN/mm <sup>2</sup> ) | Pre EC   | 57.41 ± 9.98   | 58.46 ± 6.75   | 49.07 ± 17.06        | 49.19 ± 9.89       |
|                                             | Post EC  | 40.99 ± 5.20   | 38.54 ± 4.96   | 5.64 ± 4.57          | 7.29 ± 3.26        |
|                                             | Recovery | 36.92 ± 4.75   | 34.71 ± 4.57   | 6.03 ± 4.11          | 6.21 ± 4.17        |
| Time to peak (ms)                           | Pre EC   | 34.08 ± 2.23   | 35.42 ± 2.63   | 36.33 ± 4.82         | 35.71 ± 1.85       |
|                                             | Post EC  | 29.33 ± 1.64   | 29.21 ± 1.98   | 27.29 ± 1.55         | 27.75 ± 1.05       |
|                                             | Recovery | 23.92 ± 1.13   | 23.71 ± 1.06   | 22.75 ± 1.10         | 21.04 ± 3.97       |
| Half relaxation time (ms)                   | Pre EC   | 25.67 ± 4.69   | 30.33 ± 3.13   | 35.33 ± 9.38         | 40.04 ± 5.67       |
|                                             | Post EC  | 22.29 ± 1.94   | 21.79 ± 1.86   | 22.29 ± 2.49         | 22.96 ± 1.22       |
|                                             | Recovery | 16.38 ± 0.63   | 16.29 ± 0.89   | 17.08 ± 1.10         | 16.63 ± 2.03       |

All data are displayed as Mean ± SD (n=6 EDL muscles for each of the groups).

### **Maximum Absolute Force, Twitch force and Kinetics**

Supplementary table S2 shows the absolute tetanic force, twitch force, specific twitch force of NAC treated and untreated animals with respect to genotype before EC, after EC and recovery 60 minutes post EC. Twitch kinetics; time to peak (TTP) and half relaxation time (HRT) are displayed for NAC treated and untreated animals with respect to genotype for each of the experimental timepoints. There was no effect of treatment across all parameters.
